# Supplementary material for: Facile synthesis of Mn-doped Fe2O3 nanostructures: enhanced CO catalytic performance induced by manganese doping
Source: Royal Society of Chemistry journal article supplement (doi:10.1039/c5nj03694a), 2016-01-01
Supplement: c5nj03694a1.pdf [file c5nj03694a1.pdf]

## Facile synthesis of Mn-doped Fe<sub>2</sub>O<sub>3</sub> nanostructures: Enhanced CO catalytic performance induced by manganese doping

Genyuan Zhao, Jing Li, Xiaoran Niu, Ke Tang, Shuping Wang, Wenshuang Zhu, Xueqin Ma Miaoyan Ru\* and Yanzhao Yang\*

Key Laboratory for Special Functional Aggregate Materials of Education Ministry, School of Chemistry and Chemical Engineering, Shandong University, Jinan 250100, P. R. China. E-mail: [yzyang@sdu.edu.cn](mailto:yzyang@sdu.edu.cn); Fax: +86 531 88564464; Tel: +86 531 88362988.

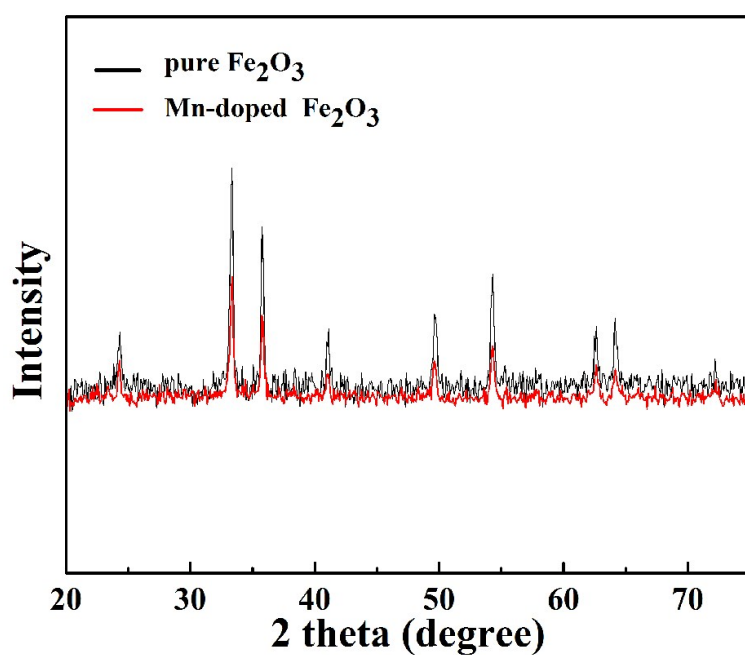

Fig. S1 Half-maximums of the peaks for Mn-doped Fe<sub>2</sub>O<sub>3</sub> and Fe<sub>2</sub>O<sub>3</sub>.

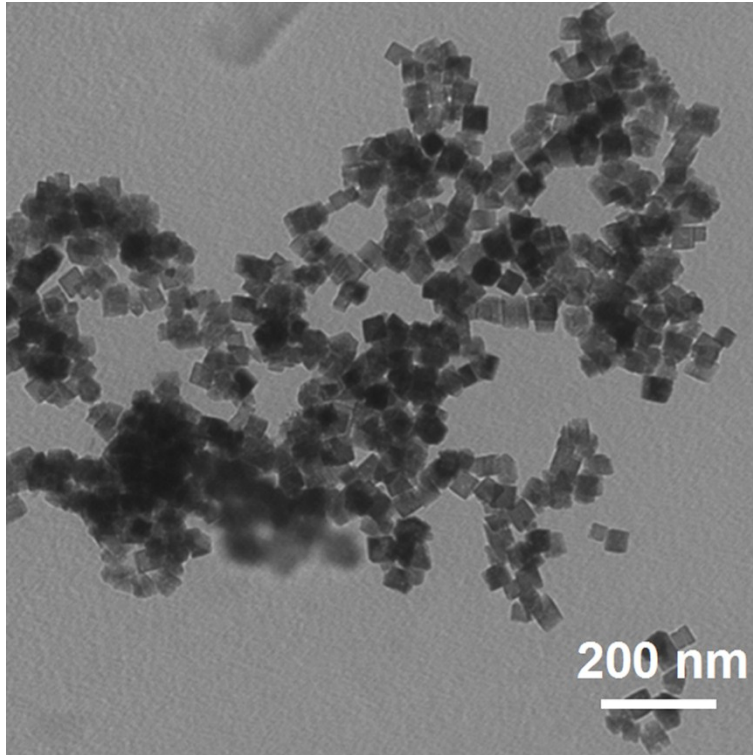

Fig. S2 The TEM images of the products with no  $\text{Mn}(\text{NO}_3)_2$  solution was added.

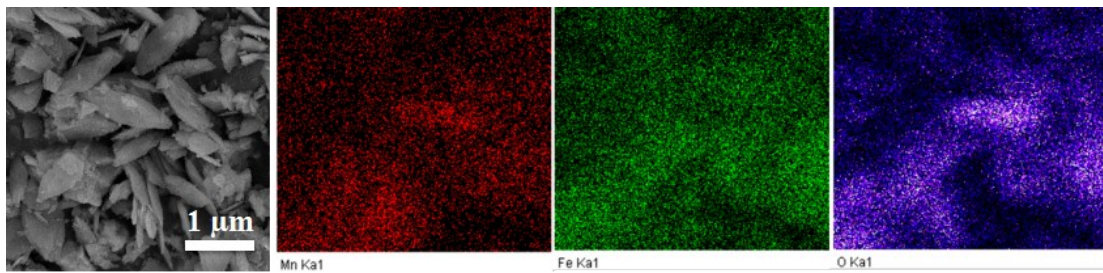

Fig. S3 EDS mapping images of sample: Fe (green), Mn (red) and O (blue).

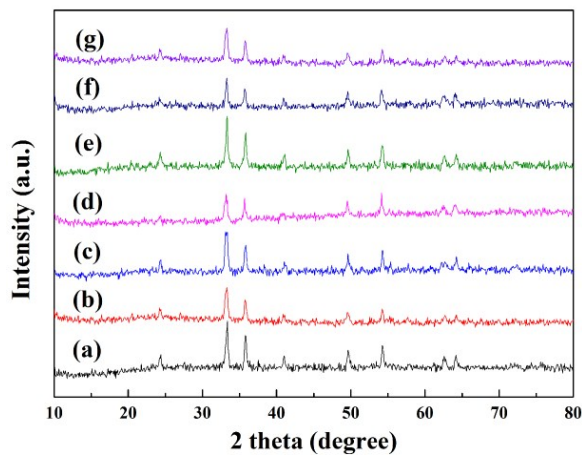

Fig. S4 XRD patterns of Mn-doped  $\text{Fe}_2\text{O}_3$  obtained with different dosages of PVP: (a) 0 g, (b) 0.02 g, (c) 0.04 g, (d) 0.06 g, (e) 0.08 g, (f) 0.1 g, (g) 0.12 g.

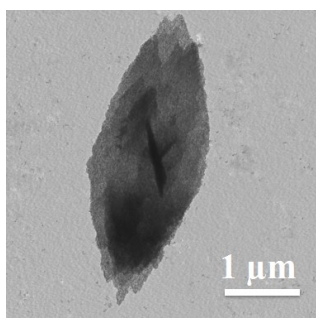

**Fig. S5** TEM images of the Mn-doped samples formed by using 0.120 g PVP.
